# Supplementary material for: Calpain Inhibition Attenuates Adipose Tissue Inflammation and Fibrosis in Diet-induced Obese Mice
Source: PubMed Central journal article supplement (PMC5663911; doi:10.1038/s41598-017-14719-9), 2017-10-31

## Supplementary Information

### Calpain Inhibition Attenuates Adipose Tissue Inflammation and Fibrosis in Diet-induced Obese Mice

Latha Muniappan<sup>1^</sup>, Aida Javidan<sup>1</sup>, Weihua Jang<sup>1</sup>, Shayan Mohammadmoradi<sup>1</sup>, Jessica J. Moorleghen<sup>1</sup>, Wendy S. Katz<sup>2</sup>, Anju Balakrishnan<sup>1</sup>, Deborah A. Howatt<sup>1</sup>, Venkateswaran Subramanian<sup>1,2\*</sup>.

<sup>1</sup>Saha Cardiovascular Research Center, University of Kentucky, Lexington, KY, USA.

<sup>2</sup>Department of Physiology, University of Kentucky, Lexington, KY, USA.

<sup>^</sup> Deceased

#### \* Address for Correspondence:

Venkateswaran Subramanian  
Saha Cardiovascular Research Center  
Department of Physiology  
BBSRB - Room 247  
University of Kentucky  
Lexington, KY 40536-0509  
E-mail: [venkat.subramanian@uky.edu](mailto:venkat.subramanian@uky.edu)

#### Online Supplement

|                   |   |   |
|-------------------|---|---|
| Number of Figures | : | 8 |
| Number of Tables  | : | 2 |

## Calpastatin Tg genotyping

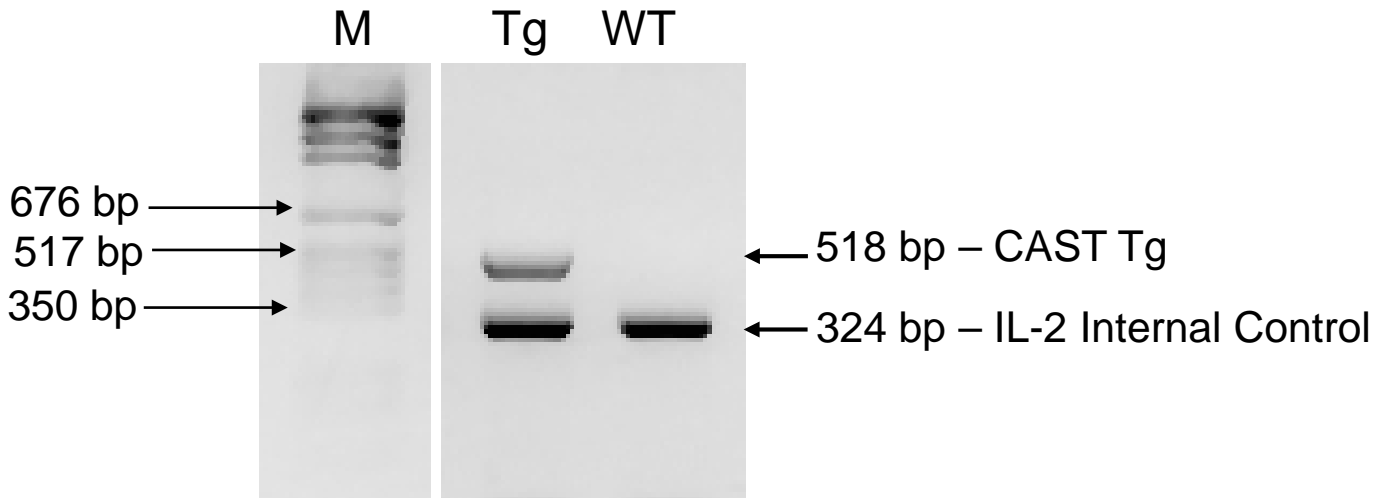

### **Supplementary Figure I. Genotyping of experimental mice for the CAST transgene (Tg) by PCR.**

**A.** Genomic DNA from tail was isolated and screened by PCR for the CAST-Tg allele. IL-2 was used as an internal control. PCR on tail DNA yielded amplicons of 518 and 324 bp for CAST-Tg and IL-2 alleles, respectively. (M= Molecular weight ladder)

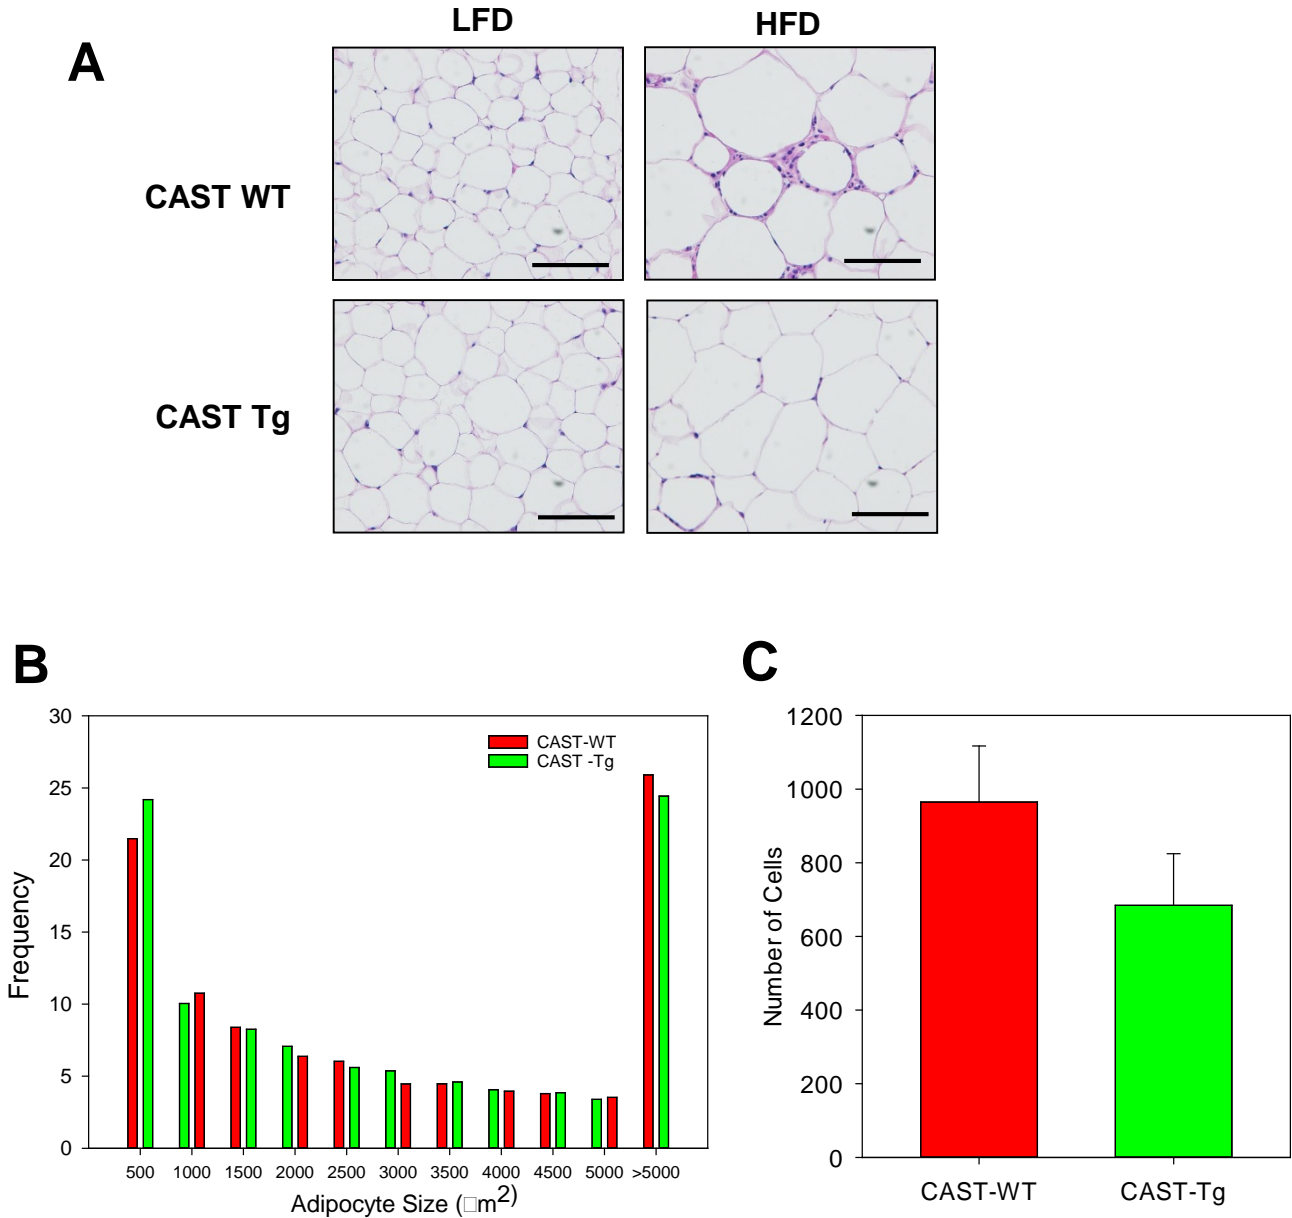

**Supplementary Figure II. CAST overexpression had no effect on obesity-induced adipocyte expansion.** **A.** Representative hematoxylin and eosin staining of EpiWAT cross-sections from LFD and HFD fed CAST WT and Tg mice. **B.** Histogram of adipocyte diameters in EpiWAT from HFD fed CAST WT and Tg mice. **C.** Quantification of adipocyte number per measurement frame (n=5-6 mice). Values are represented as mean  $\pm$  SEM.

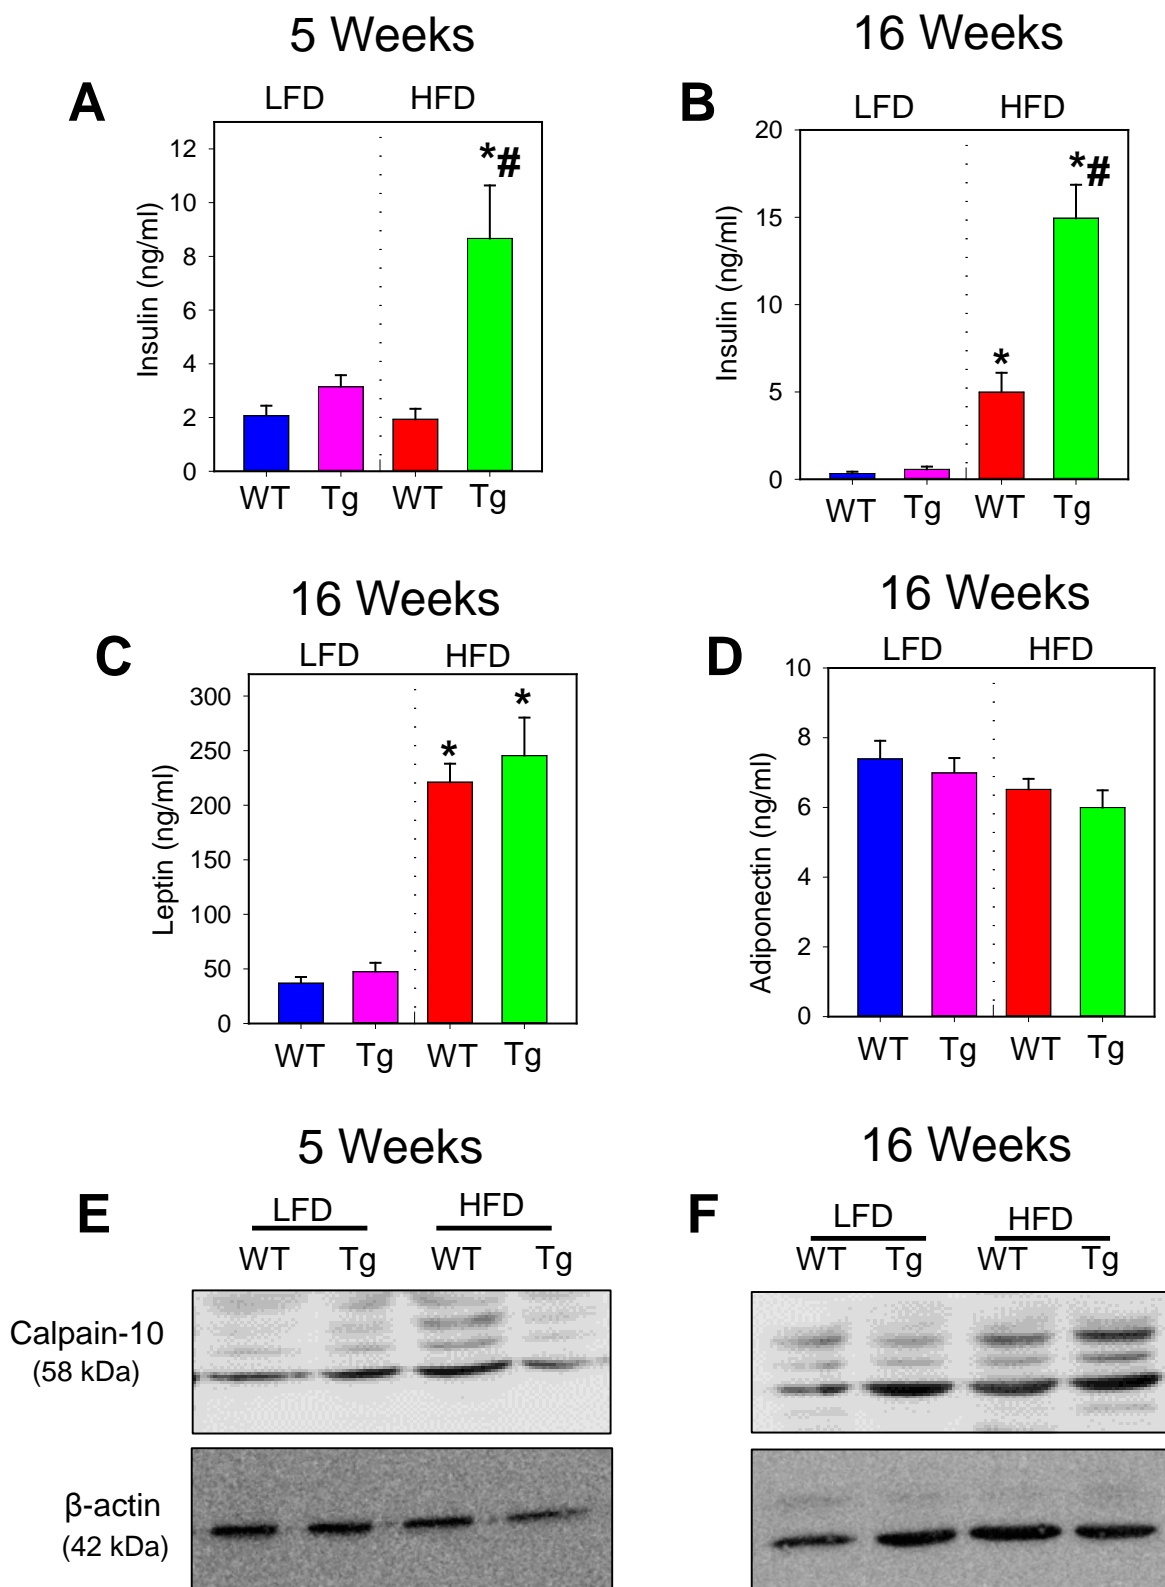

**Supplementary Figure III. CAST overexpression increased plasma insulin levels upon HFD feeding.** Plasma Insulin (A,B), leptin (C) and adiponectin (D) were measured by ELISA (n=12-14). Values are represented as mean  $\pm$  SEM. \* denotes  $P < 0.05$  HFD vs LFD; # $P < 0.05$  CAST WT vs CAST Tg (Two-way ANOVA with Holm-Sidak post hoc analysis). E, F. Calpain-10 protein was detected by Western blotting of EpiWAT extracts from WT and CAST Tg mice fed a LFD or HFD diet for 5 weeks or 16 weeks (n=4).

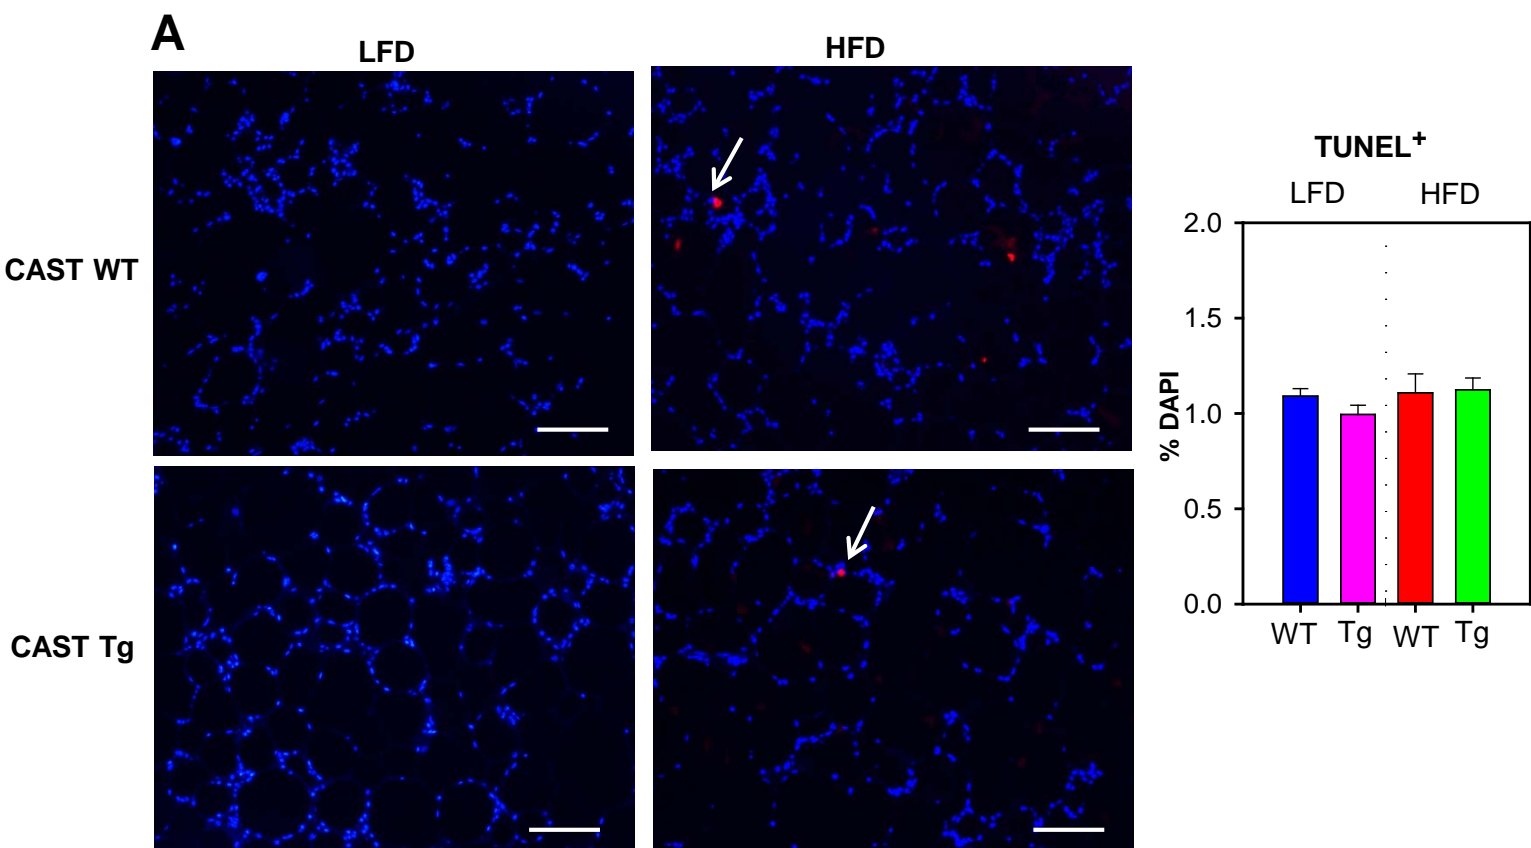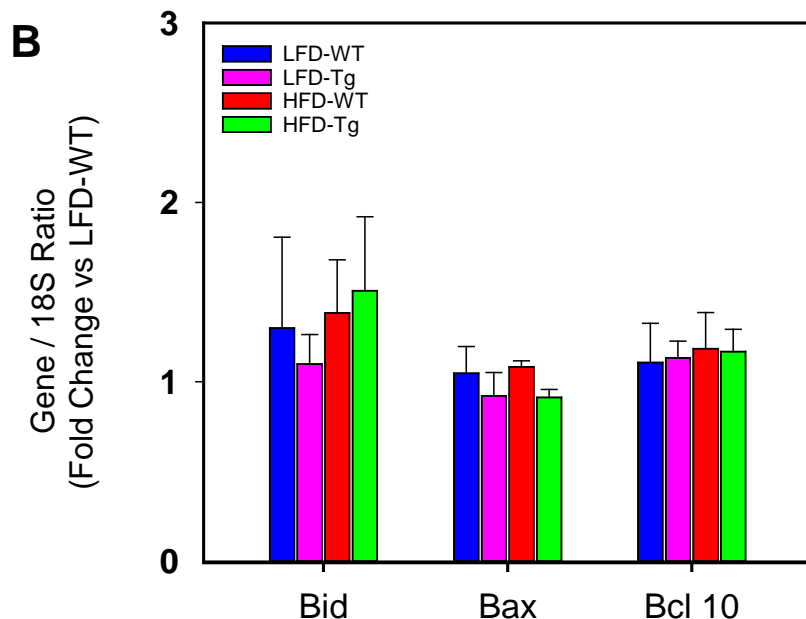

**Supplementary Figure IV. Early stage obesity does not promote adipocyte cell death.** **A.** Representative TUNEL staining of EpiWAT cross-sections from 5 weeks LFD and HFD fed CAST WT and Tg mice. The nuclei were stained with DAPI (blue) and the TUNEL-positive cells (red) were indicated by arrows. Under fluorescent microscopy, TUNEL-positive cells were counted from 10 fields at the power of 100x magnification (n=5). **B.** mRNA abundance of Bid, Bax and Bcl 10 genes in EpiWAT from LFD and HFD fed CAST WT and Tg mice were analyzed by qPCR (n=4-6). Values are represented as mean  $\pm$  SEM (Two-way ANOVA with Holm-Sidak post hoc analysis).

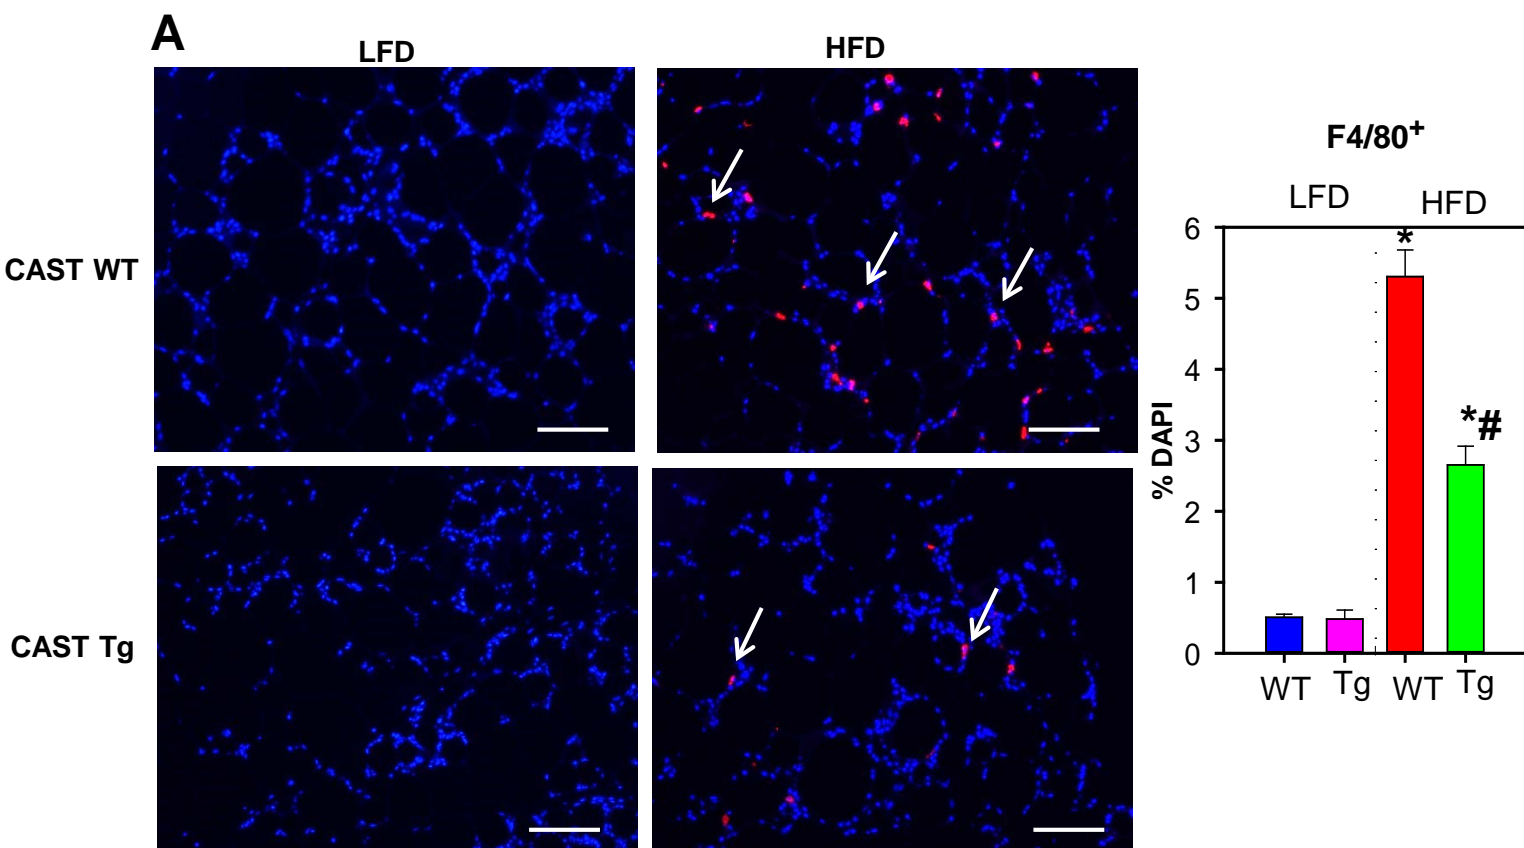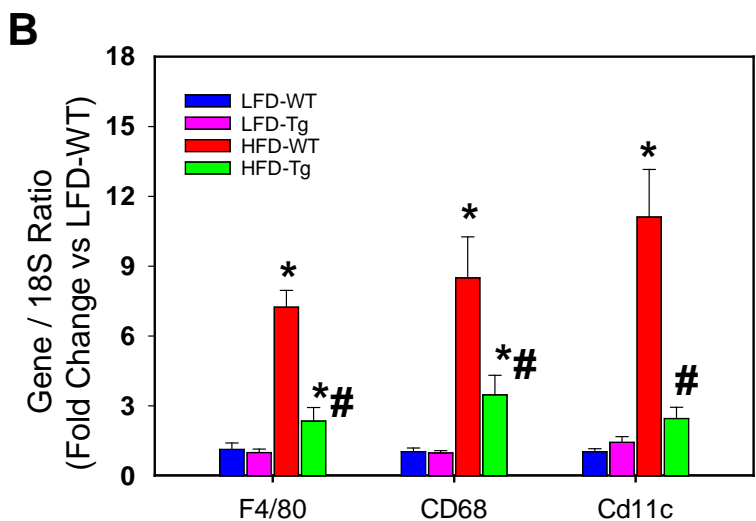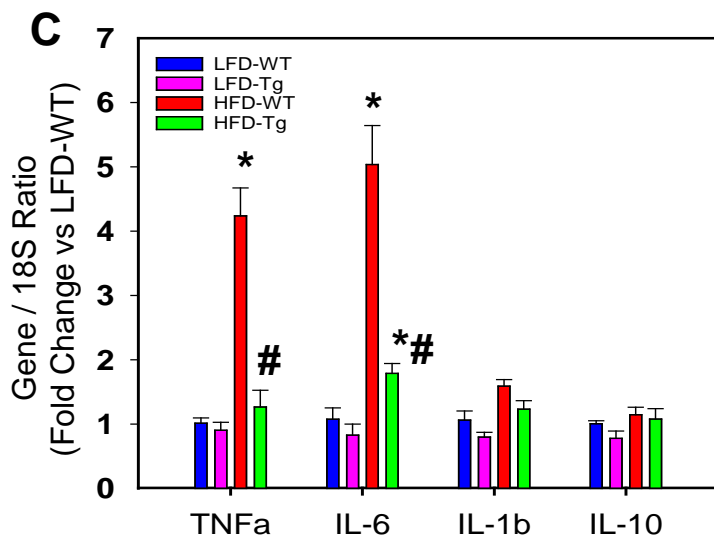

**Supplementary Figure V. CAST overexpression significantly reduced macrophage accumulation and inflammatory genes during the early stage of obesity.** **A.** Representative immunofluorescent staining of F4/80 in EpiWAT cross-sections from 5 weeks LFD and HFD fed CAST WT and Tg mice. The nuclei were stained with DAPI (blue) and the F4/80-positive cells (red) were indicated by arrows. Using fluorescent microscopy, F4/80-positive cells were counted from 10 fields at the power of 100x magnification (n=5). **B.** mRNA abundance of F4/80, CD68, and CD11c genes in EpiWAT from LFD and HFD fed CAST WT and Tg mice were analyzed by qPCR (n=5). **C.** mRNA abundance of TNF $\alpha$ , IL-6, IL-1 $\beta$ , and IL-10 genes in EpiWAT from LFD and HFD fed CAST WT and Tg mice (n=5). \* denotes  $P < 0.05$  when comparing LFD vs HFD (Two-way ANOVA with Holm-Sidak post hoc analysis).

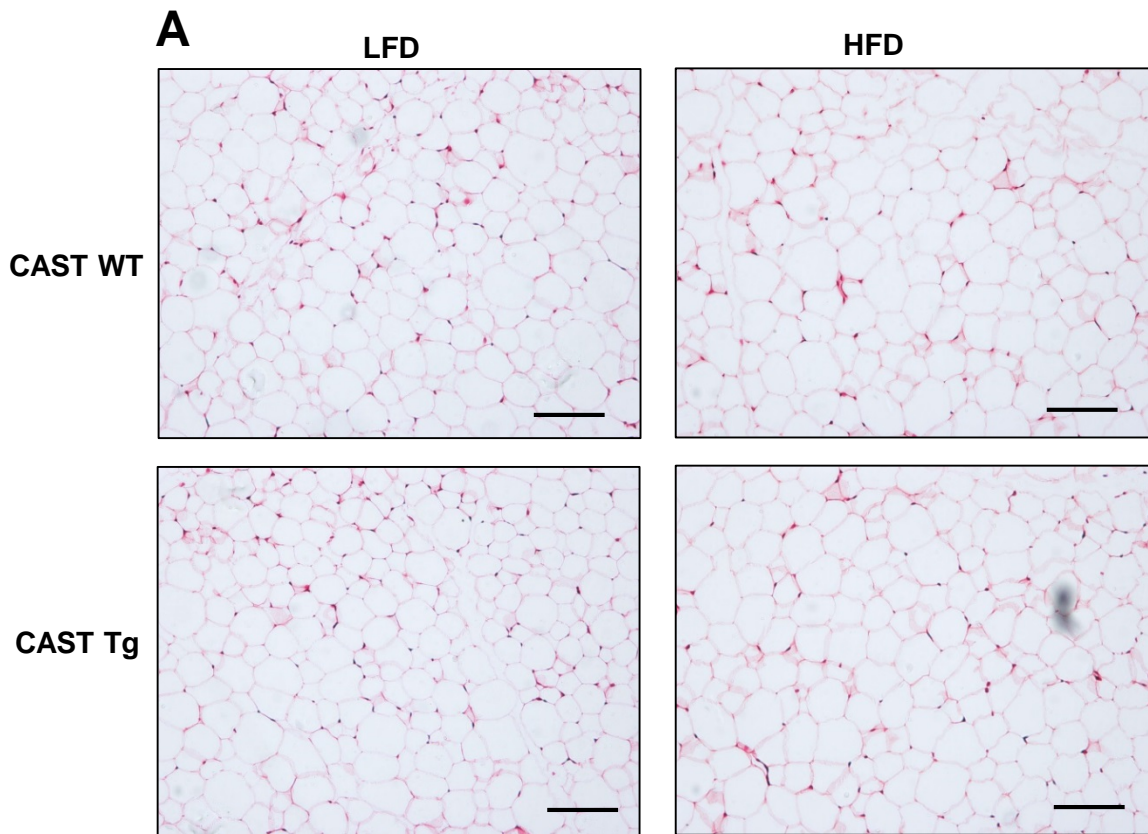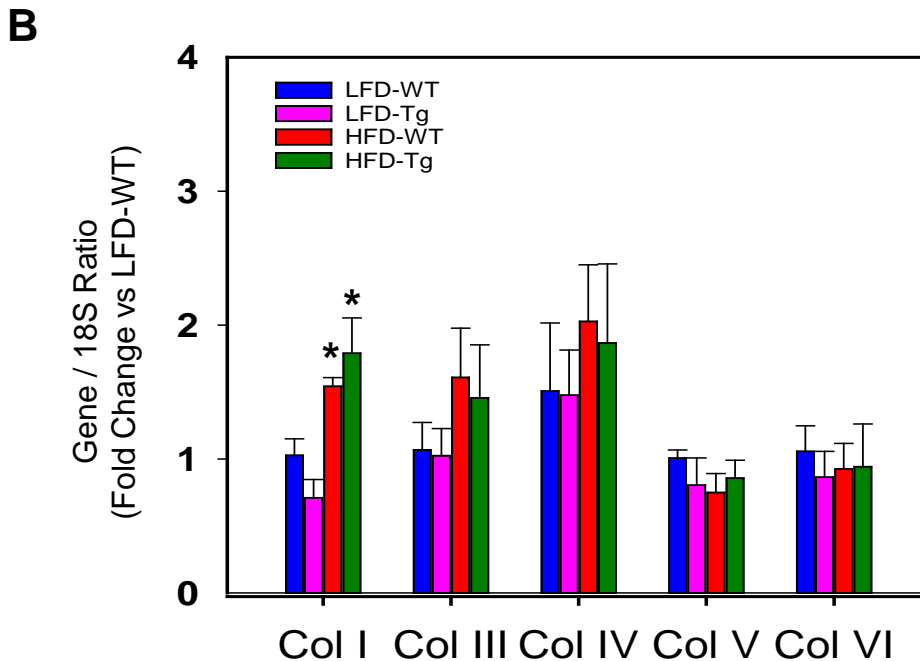

**Supplementary Figure VI. Early stage obesity showed no change in interstitial fibrosis in adipose tissue.** **A.** Representative Sirius red staining of EpiWAT cross-sections from 5 weeks LFD and HFD fed CAST WT and Tg mice. **B.** mRNA abundance of Col I, Col III, Col IV, Col V and Col VI genes in EpiWAT from LFD and HFD fed CAST WT and Tg mice were analyzed by qPCR (n=5). Values are represented as mean  $\pm$  SEM. \* denotes  $P < 0.05$  when comparing LFD vs HFD (Two-way ANOVA with Holm-Sidak post hoc analysis).

**A**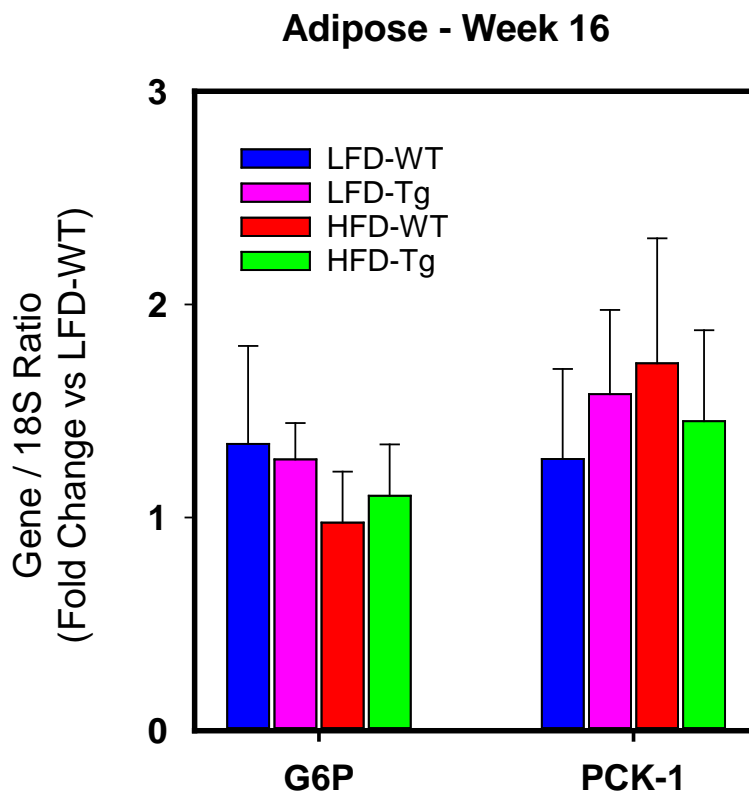**B**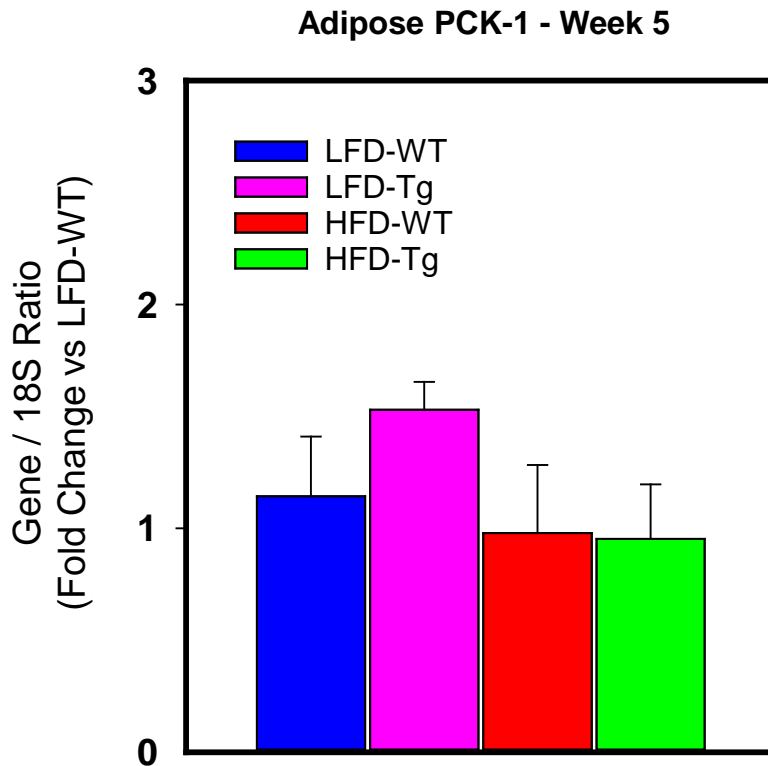

**Supplementary Figure VII. CAST overexpression had no effect on adipose tissue PCK-1 mRNA abundance.** mRNA abundance of G6P and PCK-1 in adipose tissue from 16 week (**A**) and PCK-1 in adipose tissue from 5 week (**B**) LFD and HFD fed CAST WT and Tg mice were analyzed by qPCR (n=5). Values are represented as mean  $\pm$  SEM. (Two-way ANOVA with Holm-Sidak post hoc analysis).



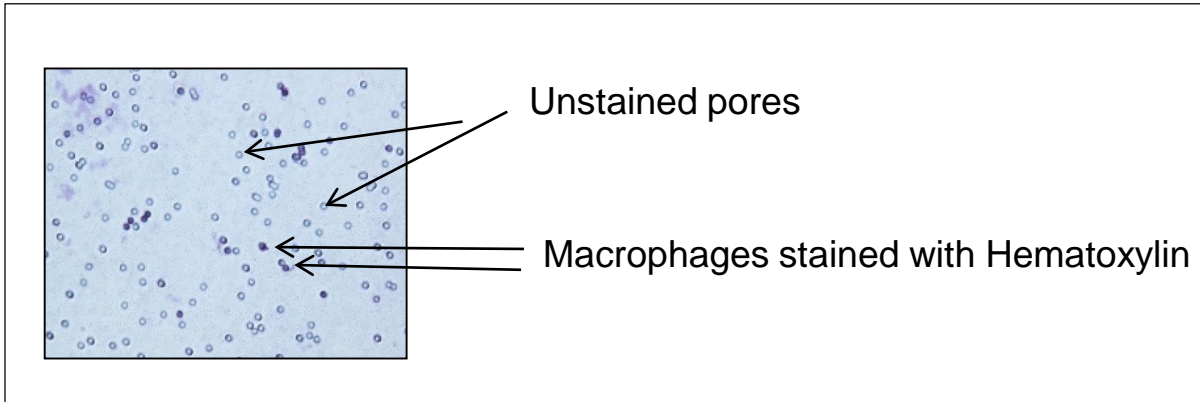

**Supplementary Figure VIII.** An example of the transwell membrane migrated macrophages stained with hematoxylin.

**Supplementary Table I. Effects of calpastatin overexpression on food and water intake in LFD and HFD fed mice**

| <b>Groups</b>         | <b>CAST WT</b> |            | <b>CAST Tg</b> |            |
|-----------------------|----------------|------------|----------------|------------|
| <b>Diet</b>           | <b>LFD</b>     | <b>HFD</b> | <b>LFD</b>     | <b>HFD</b> |
| N                     | 10             | 12         | 10             | 13         |
| Food Intake (g/day)   | 4.3 ± 0.18     | 3.5 ± 0.08 | 4.1 ± 0.13     | 3.1 ± 0.15 |
| Water Intake (ml/day) | 4.2 ± 0.88     | 3.0 ± 0.49 | 3.9 ± 0.72     | 3.2 ± 0.53 |

Values are represented as means ± SEMs.

**Supplementary Table II.** Primers used for real-time PCR

| <b>Gene</b>  | <b>Primers</b>                                                  | <b>Product size (bp)</b> |
|--------------|-----------------------------------------------------------------|--------------------------|
| Bid          | 5'-CTGCCTGTGCAAGCTTACTG-3'<br>5'-GTCTGGCAATGTTGTGGATG-3'        | 142                      |
| Bax          | 5'-TGTTTGCTGATGGCAACTTC-3'<br>5'-GATCAGCTCGGGCACTTTAG-3'        | 104                      |
| Bcl 10       | 5'-GCAGGGAGAAAACACAGAGC-3'<br>5'-CGGAATTGCACCTAGAGAGG-3'        | 156                      |
| Herpud 1     | 5'-CCTGGCTTCTCTGGCTACAC-3'<br>5'-GTCGGGACAAAAGTTCCTGA-3'        | 104                      |
| F4/80        | 5'-CTGTAACCGGATGGCAAAC-3'<br>5'-ATGGCCAAGGCAAGACATAC-3'         | 123                      |
| CD68         | 5'-CCAATTCAGGGTGAAGAAA-3'<br>5'-ATGGGTACCGTCACAACCTC-3'         | 114                      |
| CD11c        | 5'-CAAAATCTCCAACCCATGCT-3'<br>5'-TCTGGGAAGCCAAATACGAC-3'        | 128                      |
| CD206        | 5'-CAAGGAAGGTTGGCATTGT-3'<br>5'-CCTTTCAGTCCTTTCGAAGC-3'         | 111                      |
| MCP-1        | 5'-CAGCCAGATGCAGTTAACGC -3'<br>5'-TCTGGACCCATTCTTCTTG-3'        | 175                      |
| CCR2         | 5'-ACACCCTGTTTCGCTGTAGG-3'<br>5'-GATTCCTGGAAGGTGGTCAA-3'        | 133                      |
| TNF $\alpha$ | 5'-CCCACTCTGACCCCTTACTC-3'<br>5'-TCACTGTCCCAGCATCTTGT-3'        | 114                      |
| IL-6         | 5'-GGGAAATCGTGGAAATGAGAAA-3'<br>5'-AAGTGCATCATCGTTGTTTCATACA-3' | 167                      |
| IL-1 $\beta$ | 5'-TCGTGCTGTCGGACCCATAT-3'<br>5'-GTCGTTGCTTGGTTCTCCTTGT-3'      | 110                      |
| IL-10        | 5'-CCAAGCCTTATCGGAAATGA-3'<br>5'-TCTCACCCAGGGAATTCAA-3'         | 190                      |
| Col I        | 5'-TGGCAACAAAGGAGACACTG-3'<br>5'-GGCTCCTCGTTTTCTTCTT-3'         | 97                       |
| Col III      | 5'-ACCAAAAGGTGATGCTGGAC-3'<br>5'-GACCTCGTGCTCCAGTTAGC-3'        | 110                      |
| Col IV       | 5'-CCAAAGGATCAGTTGGAGGA-3'<br>5'-CTCTCCTTTGGCTCCCTTCT-3'        | 119                      |
| Col V        | 5'-GGTCCCTGACACACCTCAGT-3'<br>5'-TGCTCCTCAGGAACCTCTGT-3'        | 183                      |

|               |                                                             |     |
|---------------|-------------------------------------------------------------|-----|
| Col VI        | 5'-GGGACACGACACCTCTCAGT-3'<br>5'-TTGGCAGGAAATGACATTGA-3'    | 119 |
| ABCA1         | 5'-CTGGTTTGGTGAGGAAATTCA-3'<br>5'-ACCTTCATGCCATCTCGGTA-3'   | 150 |
| ABCG1         | 5'-GCTGGGAAGTCCACACTCAT-3'<br>5'-ATCATGGGTCTCTGAAGAGT-3'    | 173 |
| FAS           | 5'-CCAGTGTCACCACCAAGCG-3'<br>5'-GGAGCGCAGGATAGACTCAC-3'     | 111 |
| FABP          | 5'-CAATAGGTCTGCCCCGAGGAC-3'<br>5'-AGCTTGACGACTGCCTTGAC-3'   | 193 |
| G6P           | 5'-TGGATTCCGGTGTGTTGAACG-3'<br>5'-GCAAGGTAGATCCGGGACAG-3'   | 84  |
| PCK-1         | 5'-ATGAAAGGCCCGCACCATGTA-3'<br>5'-AGGCCAGTTGTTGACCAAA-3'    | 235 |
| PPAR $\gamma$ | 5'- AGCATCAGGCTTCCACTATG -3'<br>5'- ATCCGGCAGTTAAGATCACA-3' | 111 |
| Adiponectin   | 5'-GGAACTTGTGCAGGTTGGAT-3'<br>5'-CGAATGGGTACATTGGGAAC-3'    | 293 |
| CEBP $\alpha$ | 5'-TGGACAAGAACAGCAACGAG-3'<br>5'-TCACTGGTCAACTCCAGCAC-3'    | 127 |
| CEBP $\beta$  | 5'-CAAGCTGAGCGACGAGTACA-3'<br>5'-AGCTGCTCCACCTTCTTCTG-3'    | 156 |
| PREF-1        | 5'-GGCAGTGCATCTGCAAGGAT-3'<br>5'-CAGGTCCACGCAAGTTCCAT-3'    | 104 |
| UCP-1         | 5'-TGGAAAGGGACGACCCCTAA-3'<br>5'-CAGGAGTGTGGTGCAAAACC-3'    | 168 |
| 18S           | 5'-CTCTGTTCCGCCTAGTCCTG<br>5'-AATGAGCCATTTCGAGTTTC          | 170 |

Full-length blot of representative Western Blot images of Figure 1A, 1D, 1E, 1F and Figure 5B and 5E.

**Figure 1**

**A**

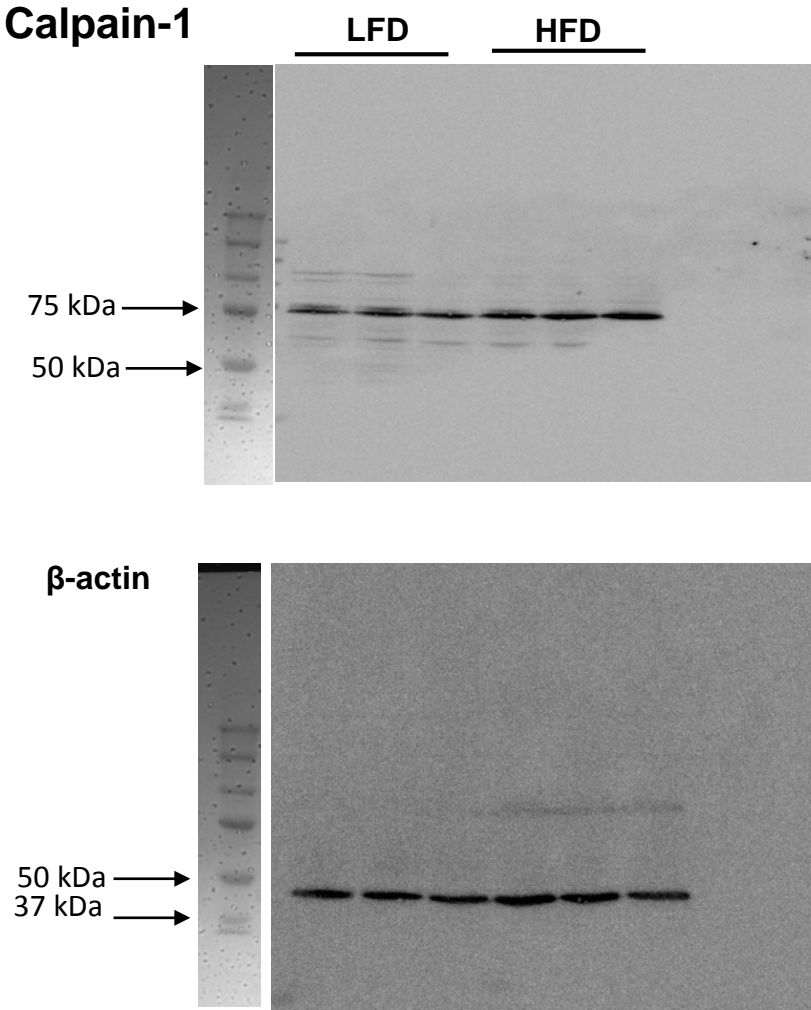

**Figure 1**

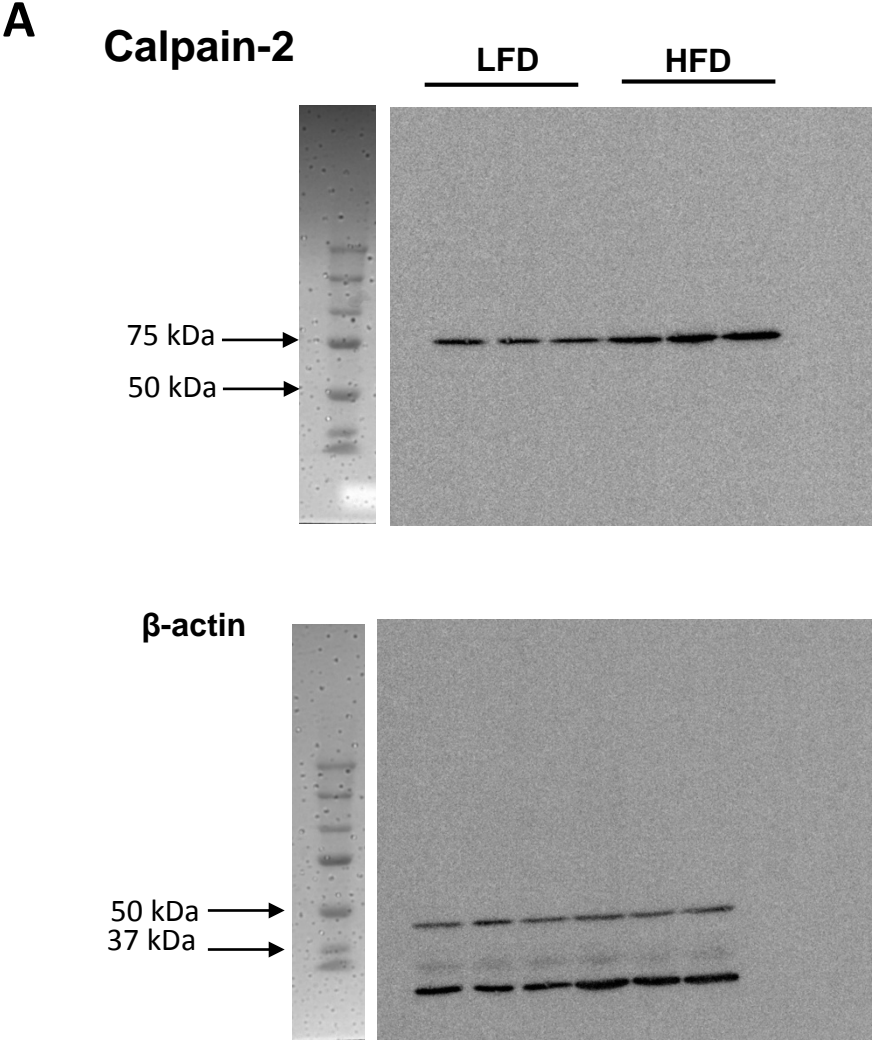

# Figure 1

## A

### Calpain-4

LFD

HFD

37 kDa →

25 kDa →

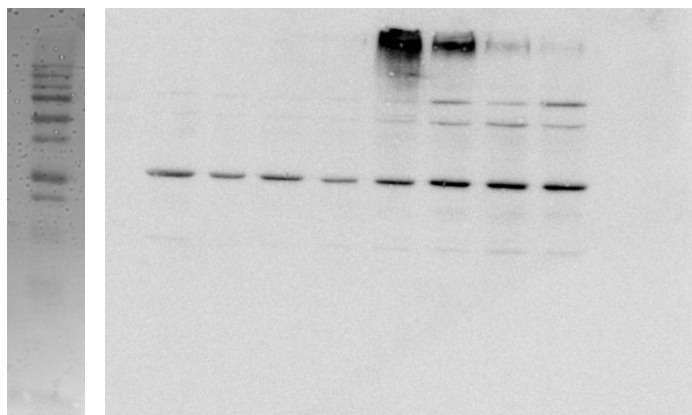

### $\beta$ -actin

50 kDa →

37 kDa →

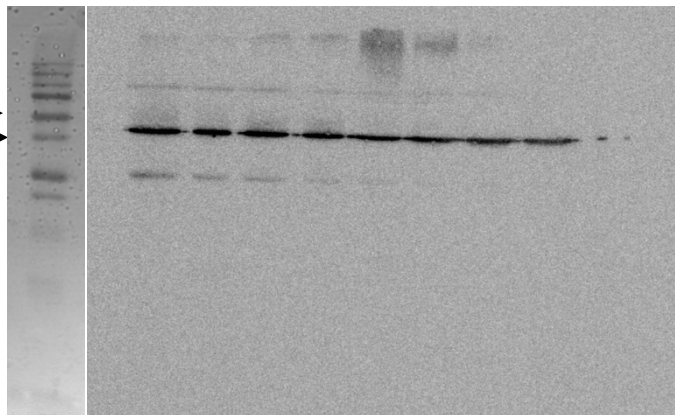



**Figure 1**

**A**

**CAST**

**LFD**

**HFD**

100 kDa →  
75 kDa →

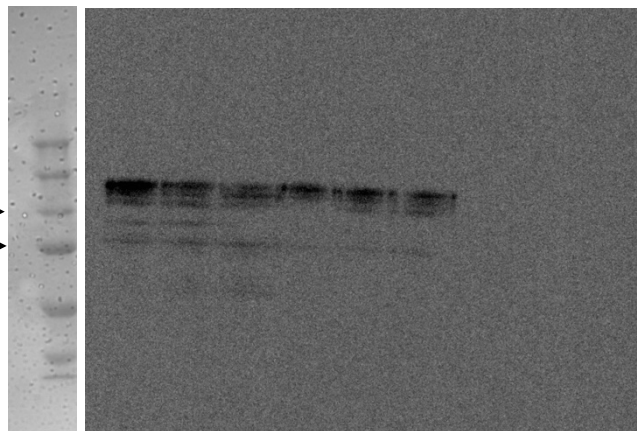

**β-actin**

50 kDa →  
37 kDa →

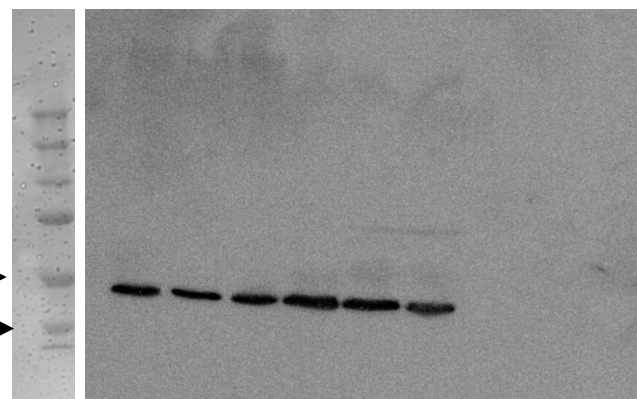

# Figure 1

**D** **Calpain-1** Adip SVF  
Epi SC Epi SC

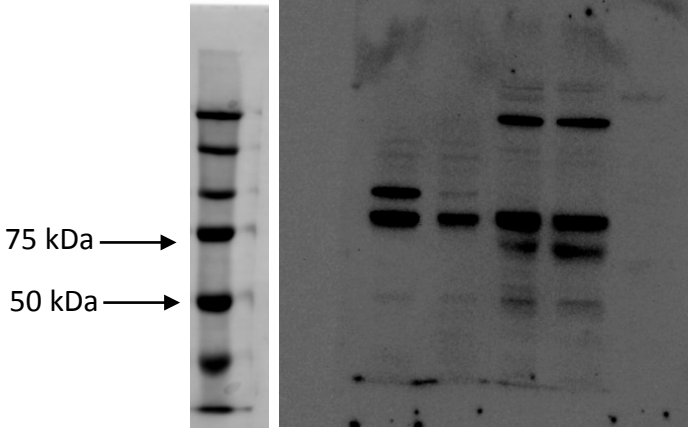

**$\beta$ -actin**

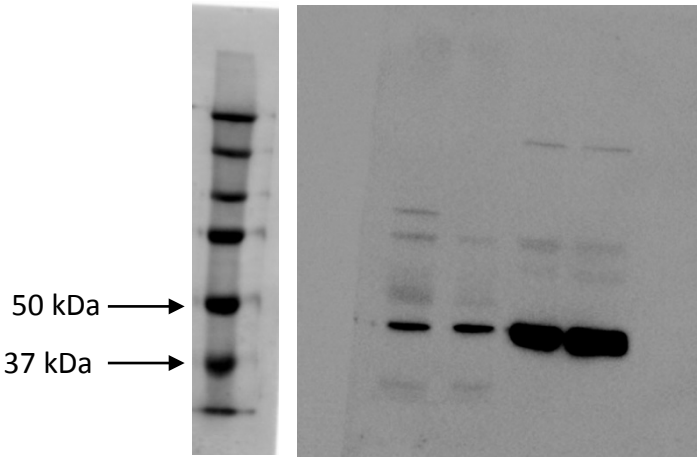

# Figure 1

## D Calpain-2

1 Minute Exposure

Adip      SVF  
Epi SC    Epi SC

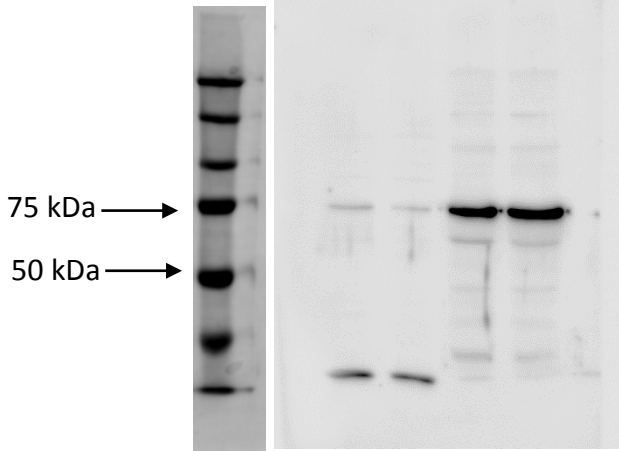

3 Minute Exposure

Adip      SVF  
Epi SC    Epi SC

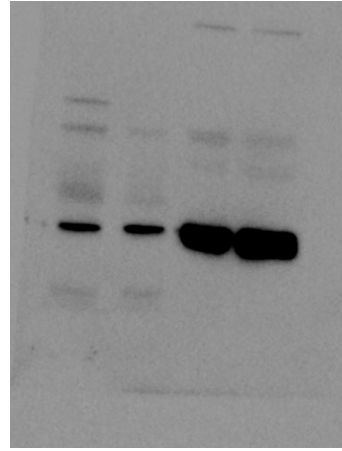

$\beta$ -actin

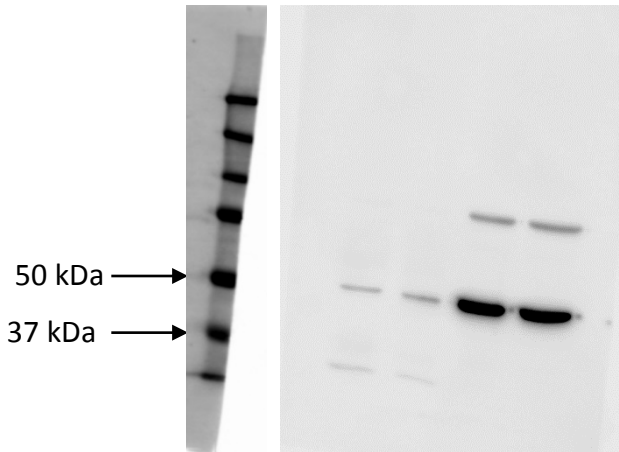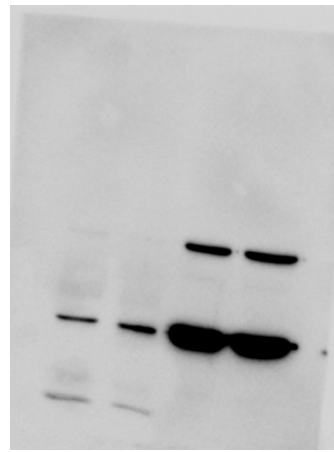

# Figure 1

## D Calpain-4

1 Minute Exposure

Adip      SVF  
Epi SC    Epi SC

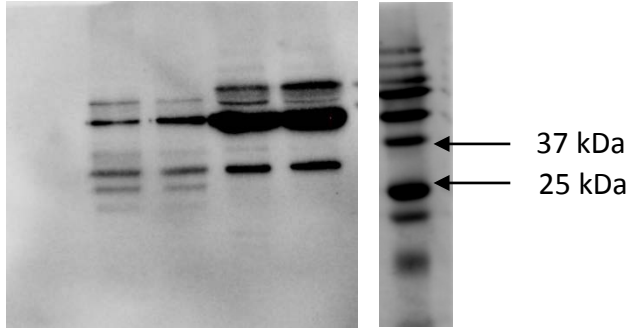

3 Minute Exposure

Adip      SVF  
Epi SC    Epi SC

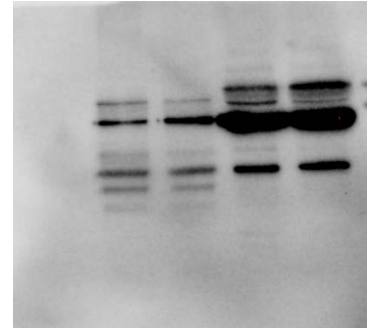

$\beta$ -actin

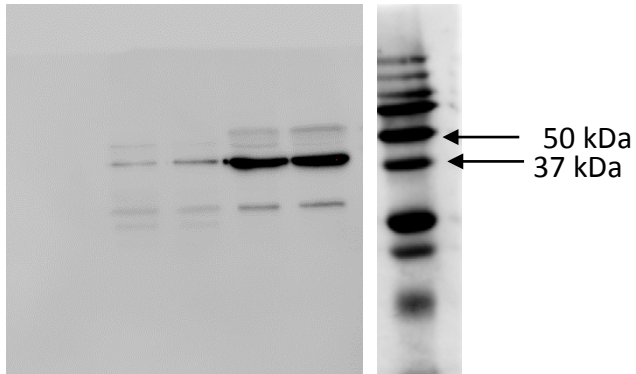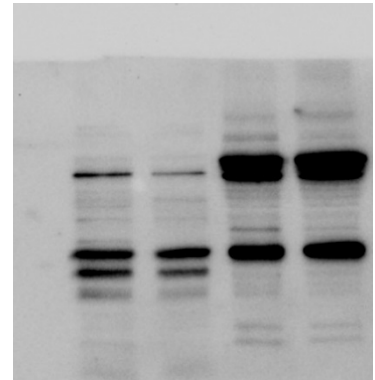

**Figure 1**

**E**

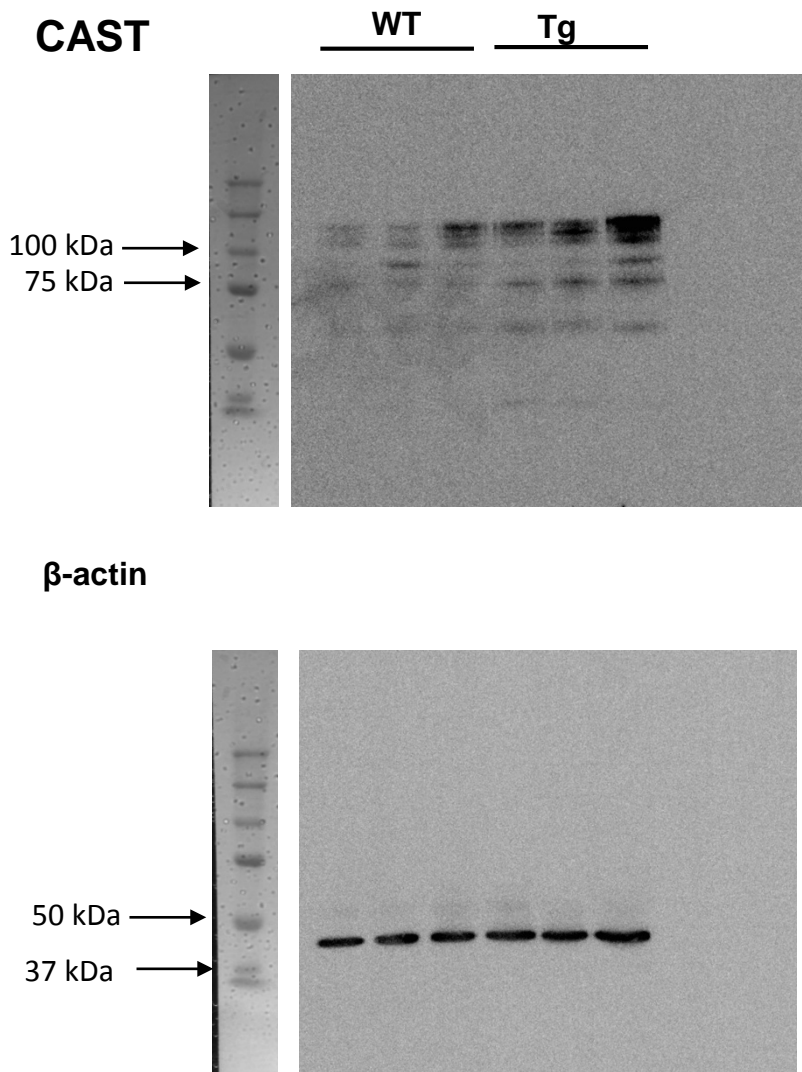

# Figure 1

**F**

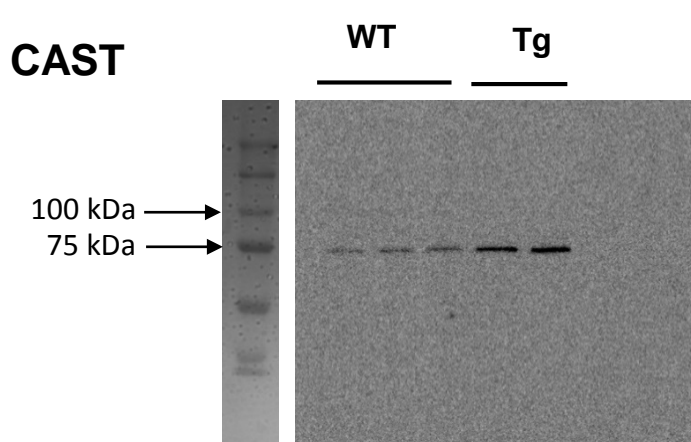

**β-actin**

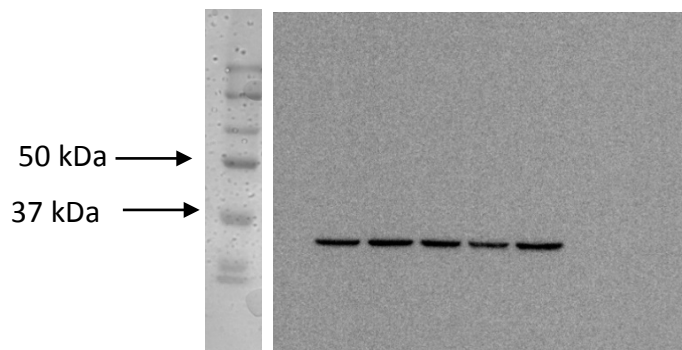

# Figure 5

## B

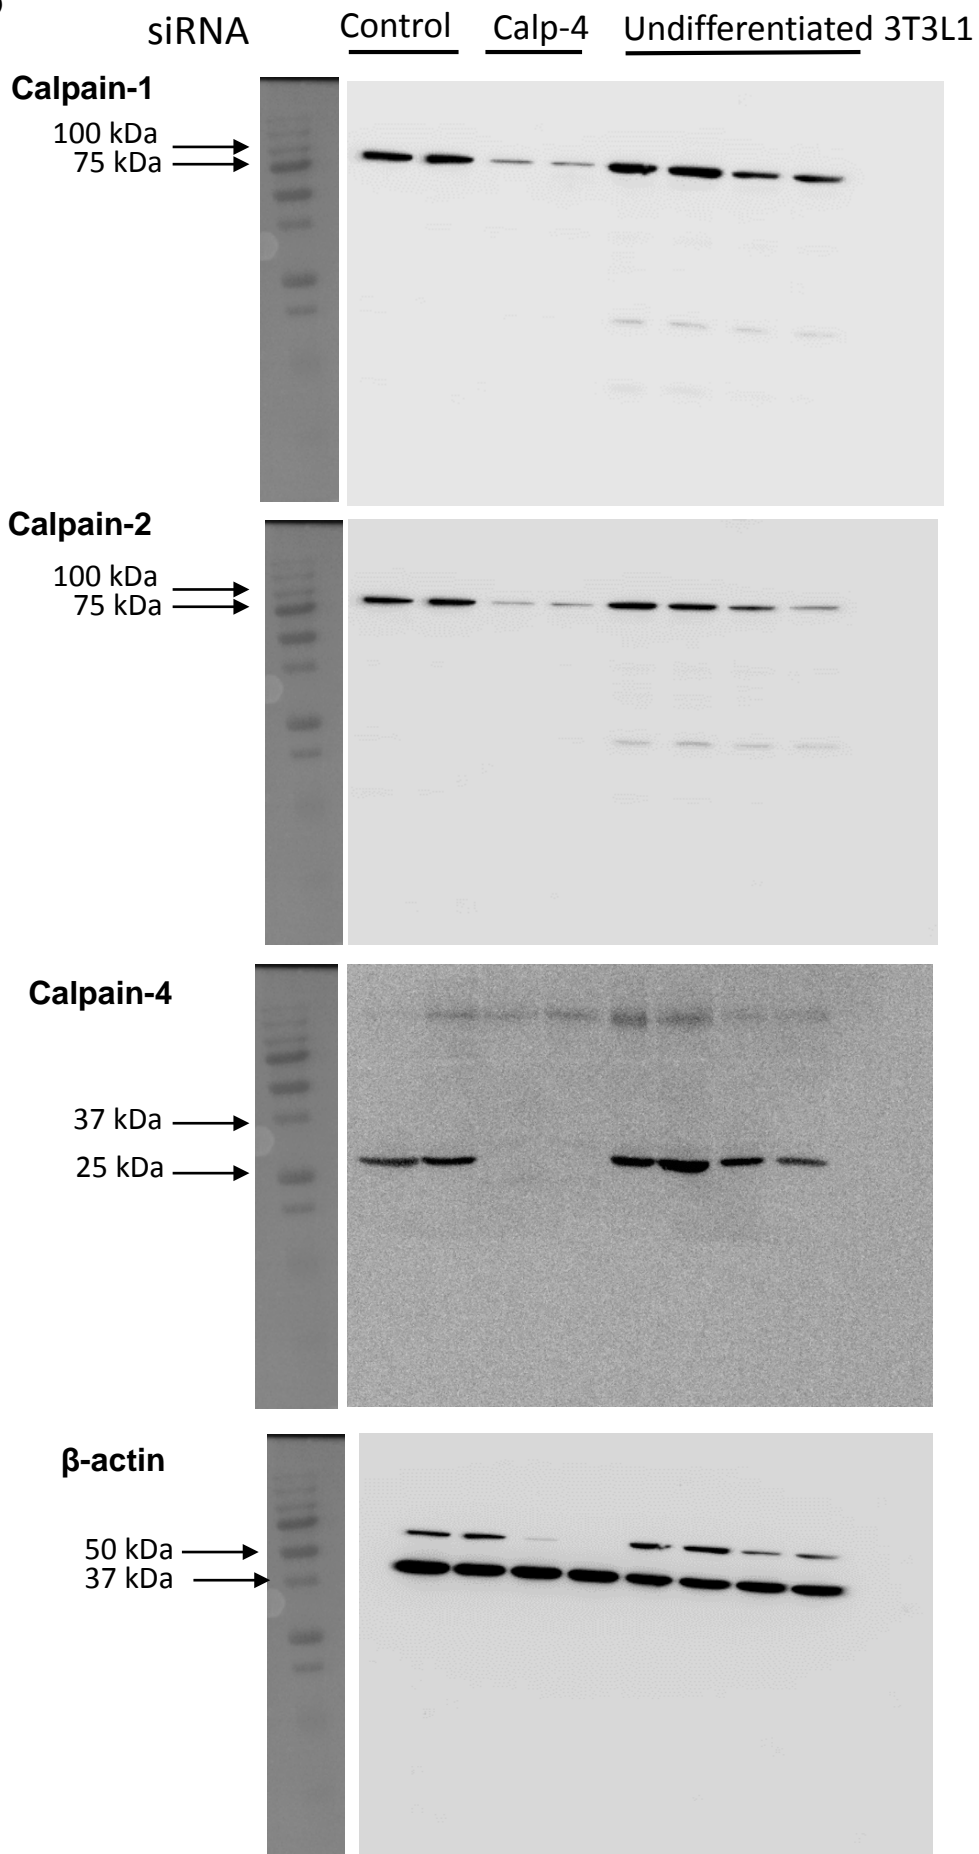

# Figure 5

## E

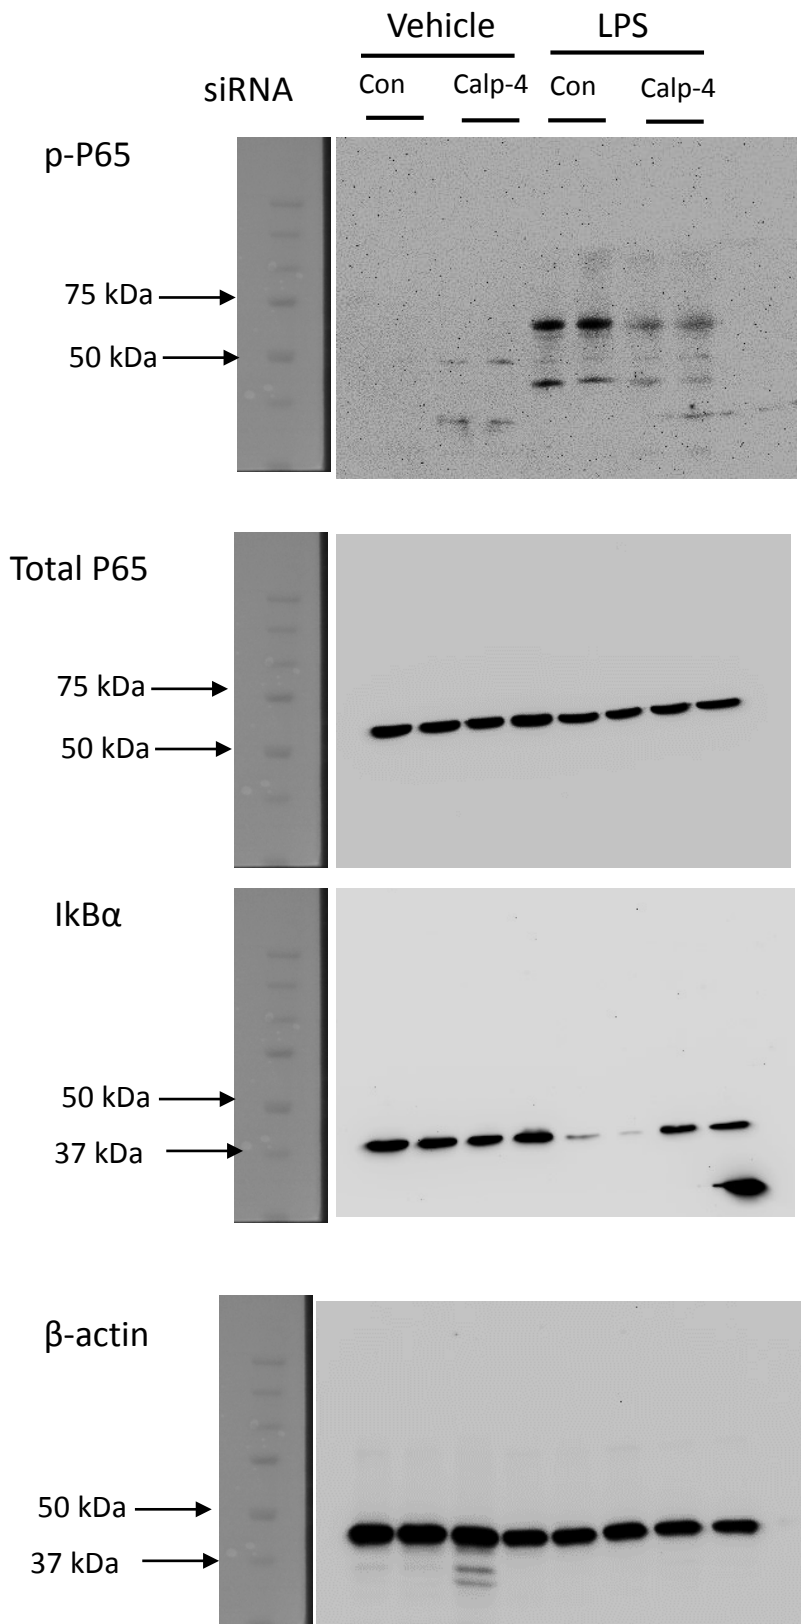

Supplement: 41598_2017_14719_MOESM1_ESM.pdf [file 41598_2017_14719_MOESM1_ESM.pdf]
